# Supplementary material for: High-Throughput Molecular Dynamics-Based Alchemical Free Energy Calculations for Predicting the Binding Free Energy Change Associated with the Selected Omicron Mutations in the Spike Receptor-Binding Domain of SARS-CoV-2
Source: Biomedicines. 2022 Nov 1;10(11):2779. doi: 10.3390/biomedicines10112779 (PMC9687918; doi:10.3390/biomedicines10112779)
Supplement: Supplementary file 1 [file biomedicines-10-02779-s001.zip › biomedicines-1908766-supplementary.pdf]

## Supporting Information

### **High-throughput molecular dynamics-based alchemical free energy calculations for predicting the binding free energy change associated with the selected omicron mutations in the spike receptor-binding domain of SARS-CoV-2**

**Rajendra Bhadane<sup>1,2</sup>, Outi M. H. Salo-Ahen<sup>1,2</sup>**

*<sup>1</sup>Structural Bioinformatics Laboratory, Faculty of Science and Engineering, Biochemistry, Åbo Akademi University, FI-20520 Turku, Finland*

*<sup>2</sup>Pharmaceutical Sciences Laboratory, Faculty of Science and Engineering, Pharmacy, Åbo Akademi University, FI-20520 Turku, Finland*

*\*Correspondence:*

*Rajendra Bhadane Tel + 358-2-2154006; Email: rajendra.bhadane@abo.fi*

*Outi M. H. Salo-Ahen Tel +358-2-215 4009; Email: outi.salo-ahen@abo.fi*

## Results of conventional MD simulations:

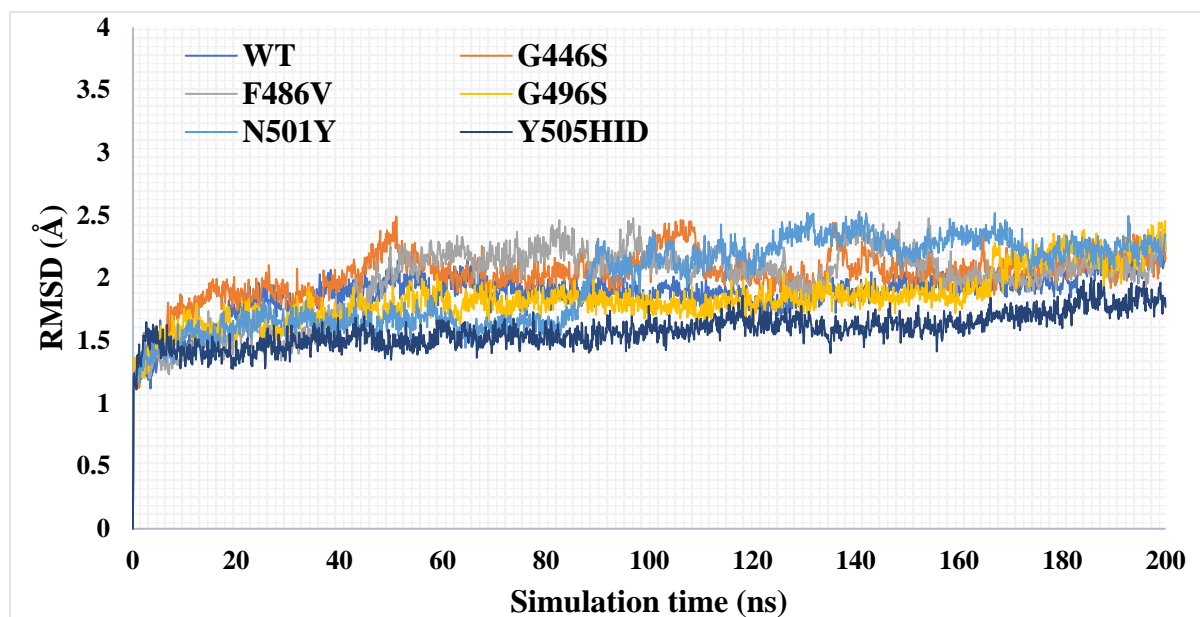

**Figure S1.** The *averaged* root-mean-square deviation (RMSD) of the wildtype (WT) and mutated protein structures of the spike RBD in complex with hACE2 during *three replicates* of 200-ns MD simulations. HID – histidine protonated at the delta nitrogen.

The RMSD plots for each individual MD run in Figure S1 are shown here below for WT and on pages S3-S5 for the mutants:

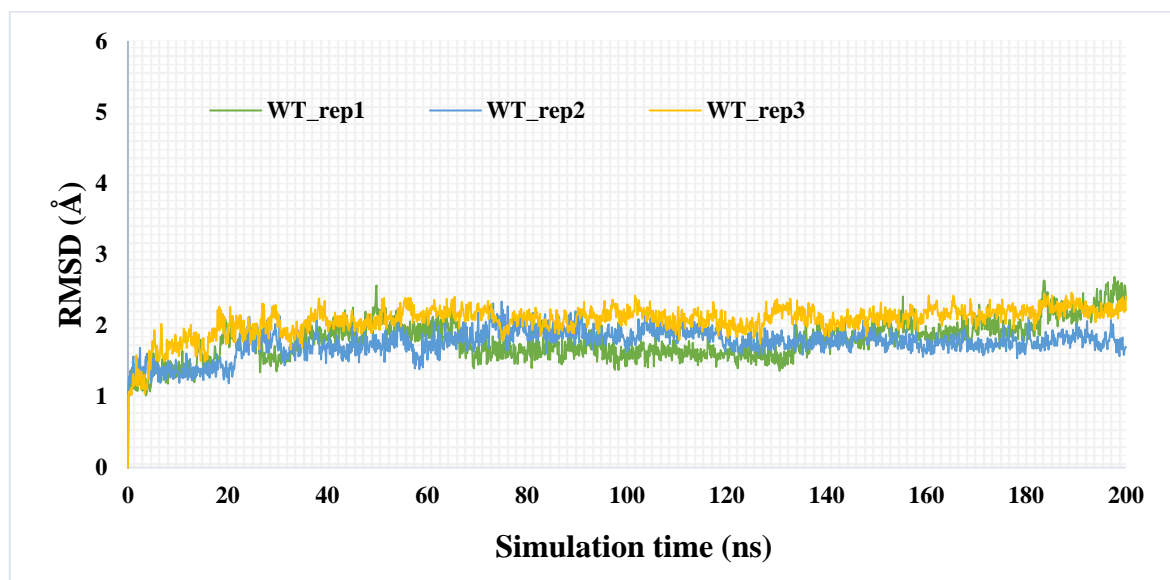

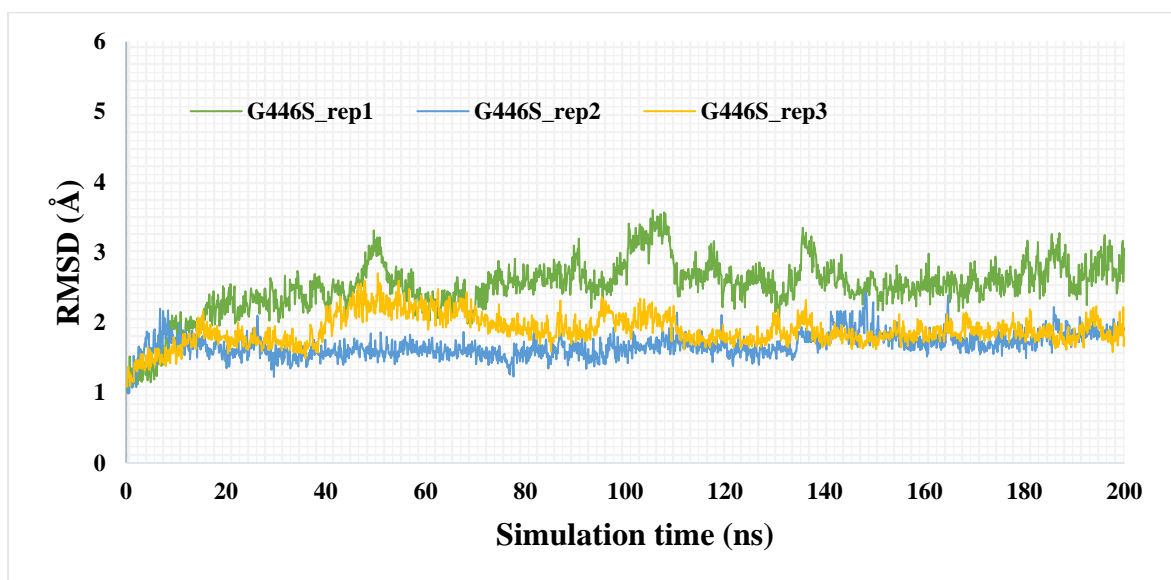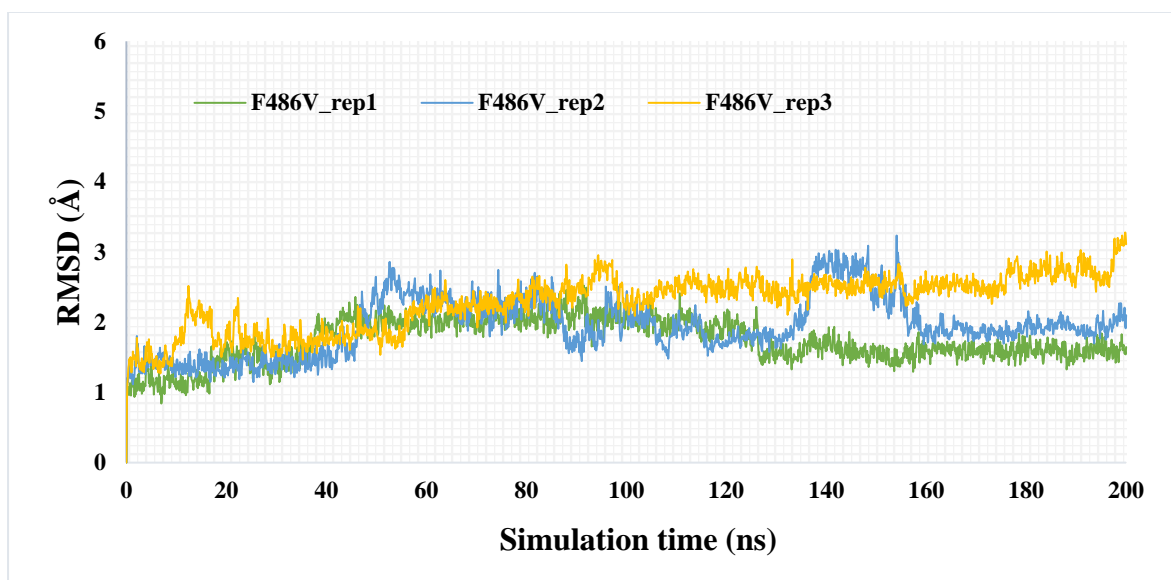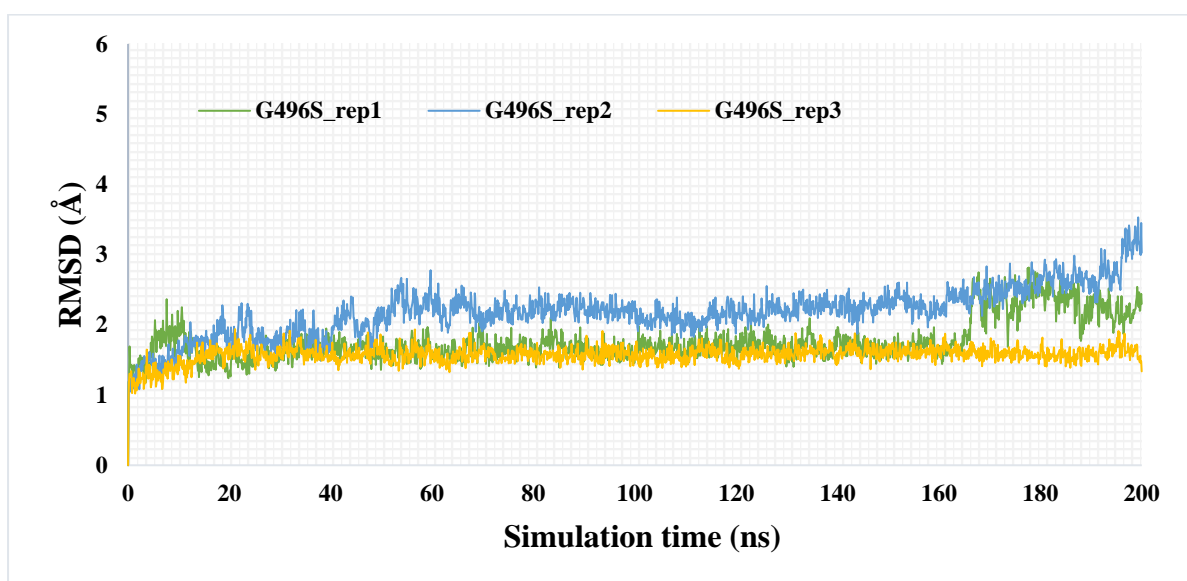

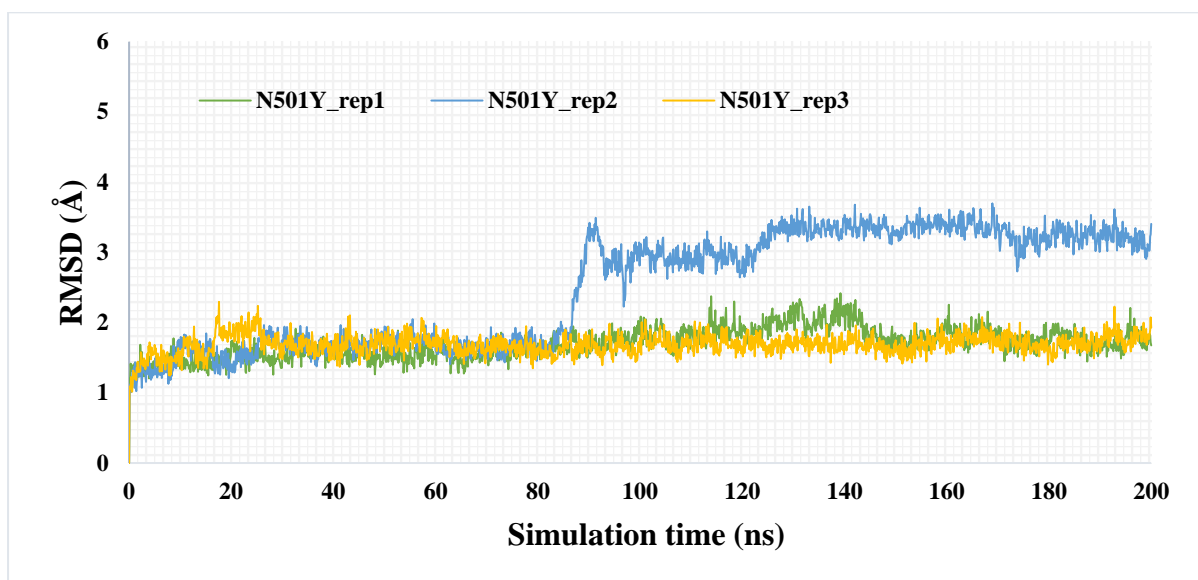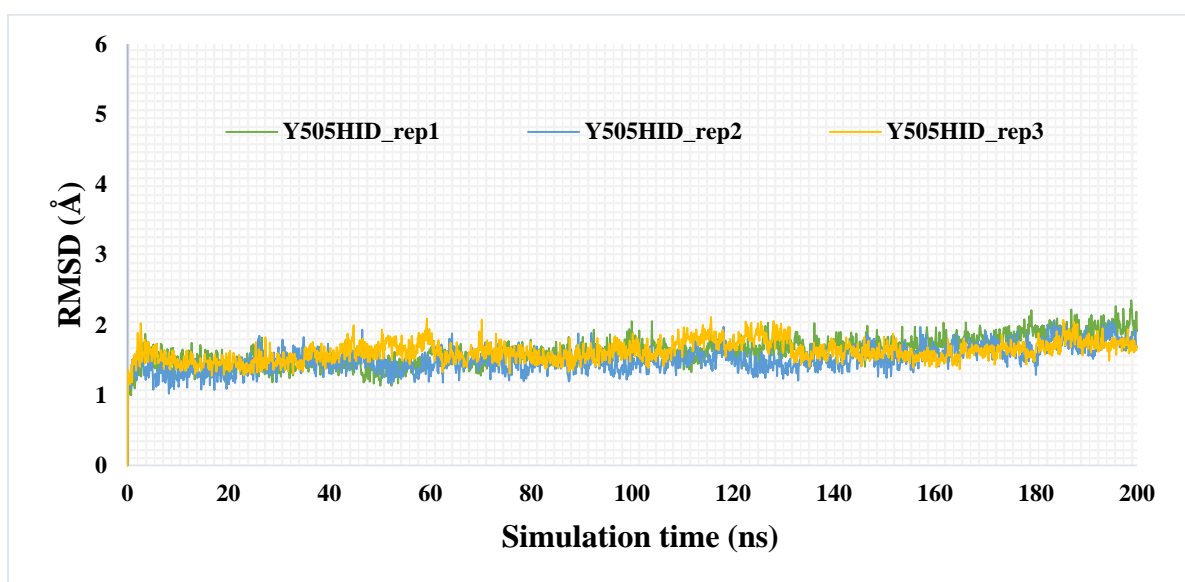

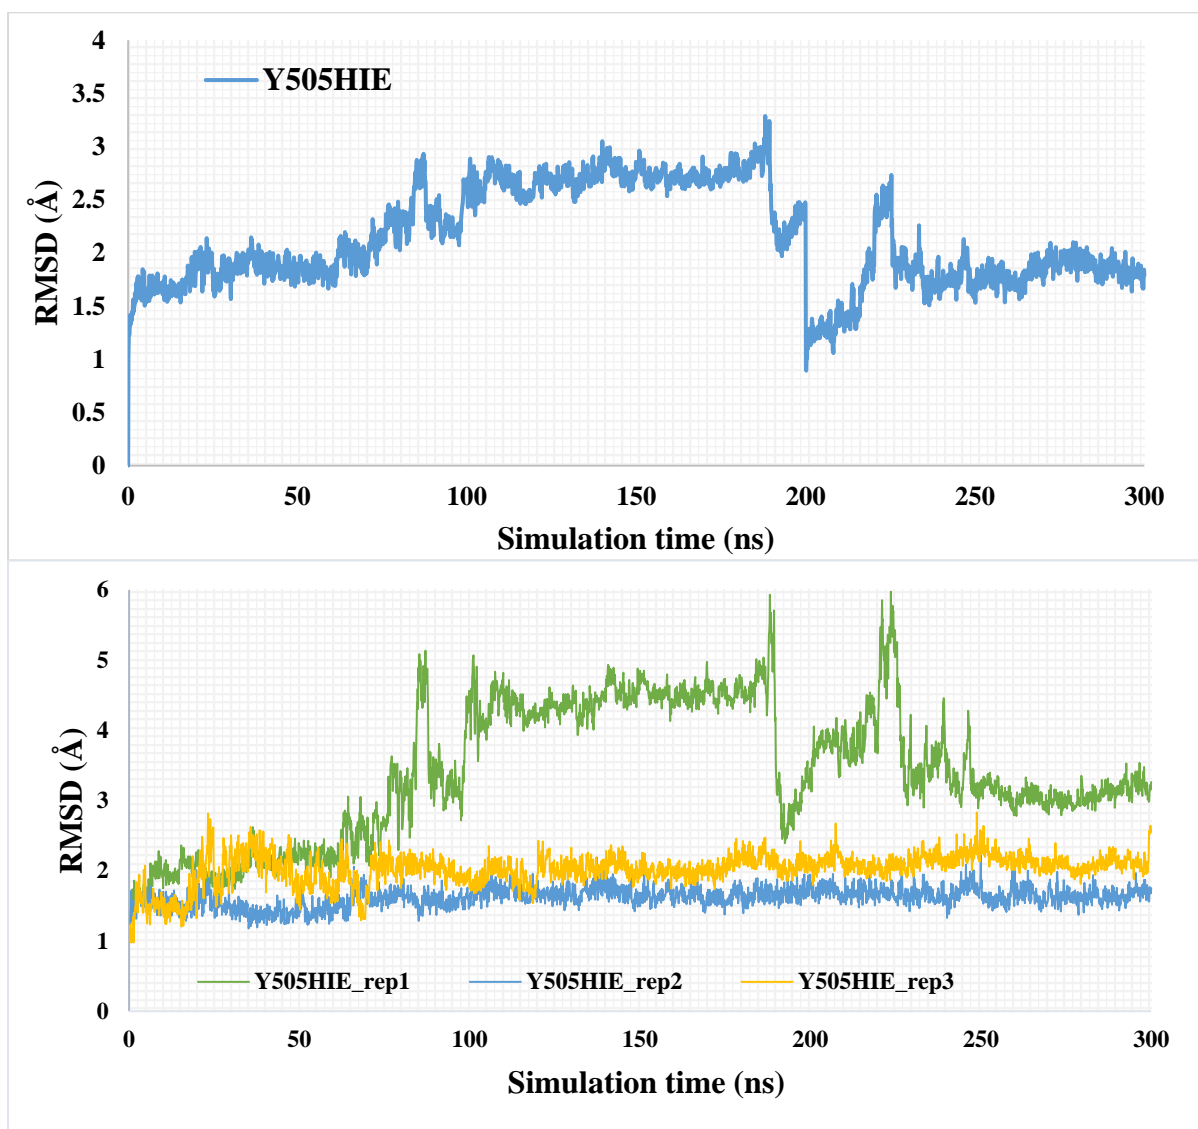

**Figure S2.** The root-mean-square deviation (RMSD) of the **Y505HIE** mutant protein structure of the spike RBD in complex with hACE2 during three replicates of **300-ns** MD simulations. Top: average of three simulations. Bottom: RMSD for the individual simulations. HIE – histidine protonated at the epsilon nitrogen.

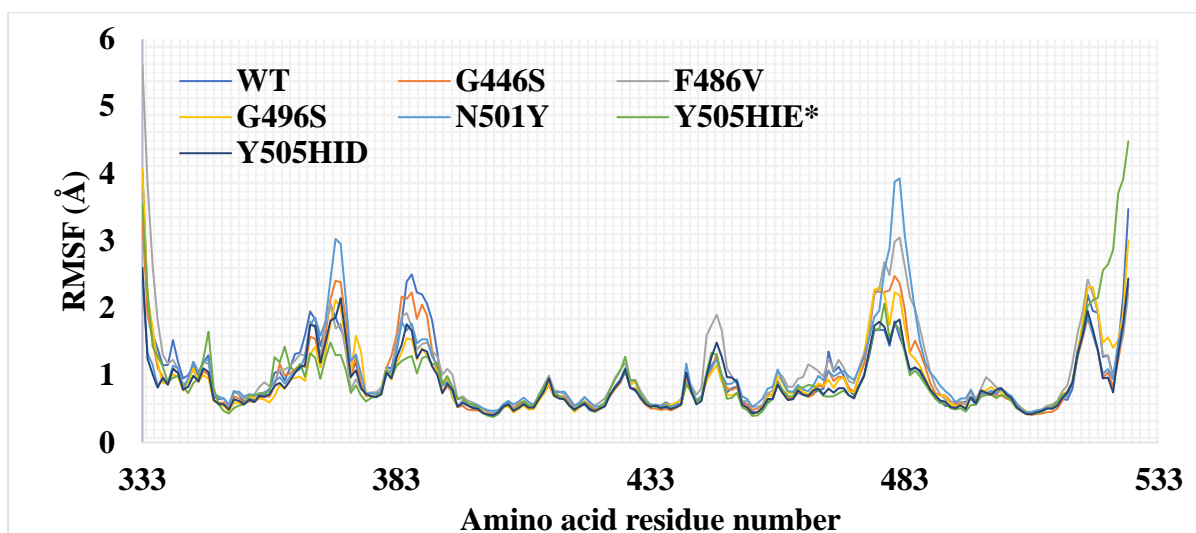

**Figure S3.** The averaged root-mean-square fluctuation (RMSF) of the WT and mutated protein structures of spike RBD in complex with hACE2 during three replicates of 200-ns MD simulations (\*Y505HIE mutant was simulated for 300 ns). HID – histidine protonated at the delta nitrogen; HIE – histidine protonated at the epsilon nitrogen.

The RMSF plots for each individual MD run are shown here below for WT and on pages S7 and S8 for the mutants:

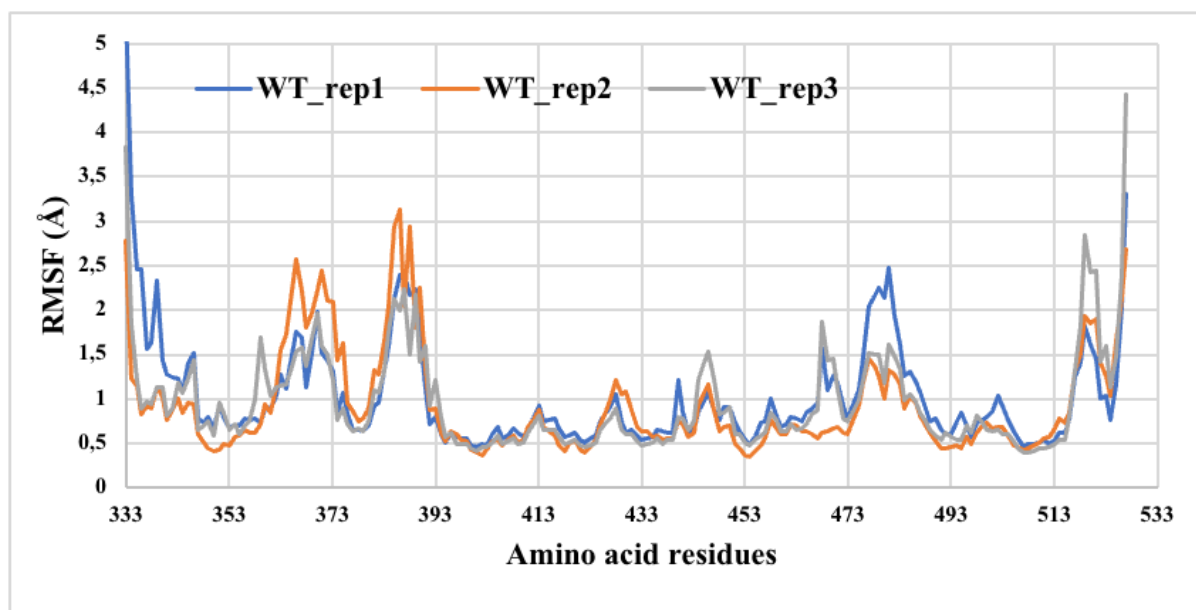

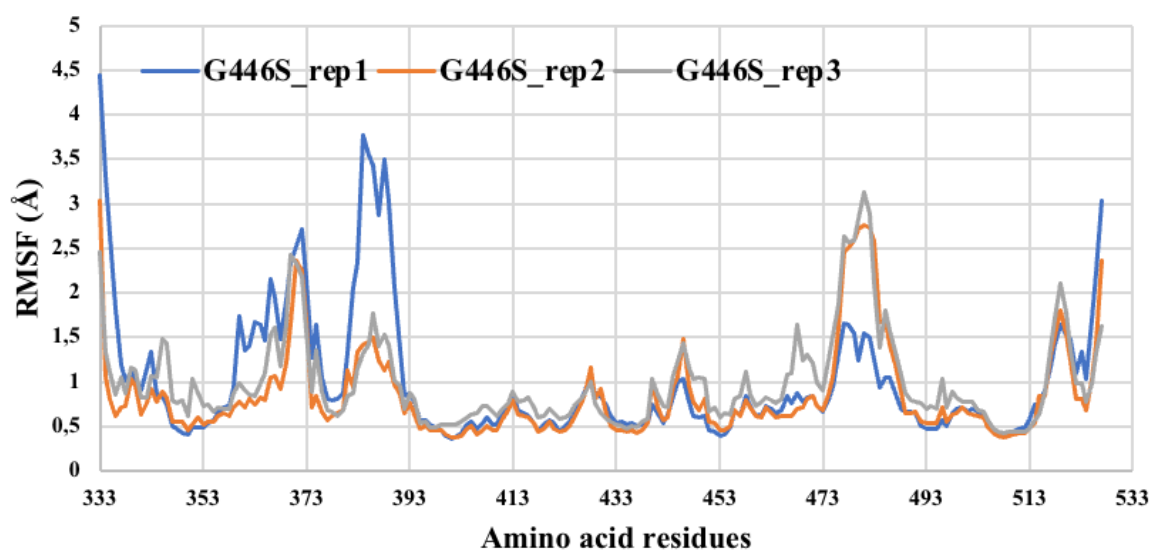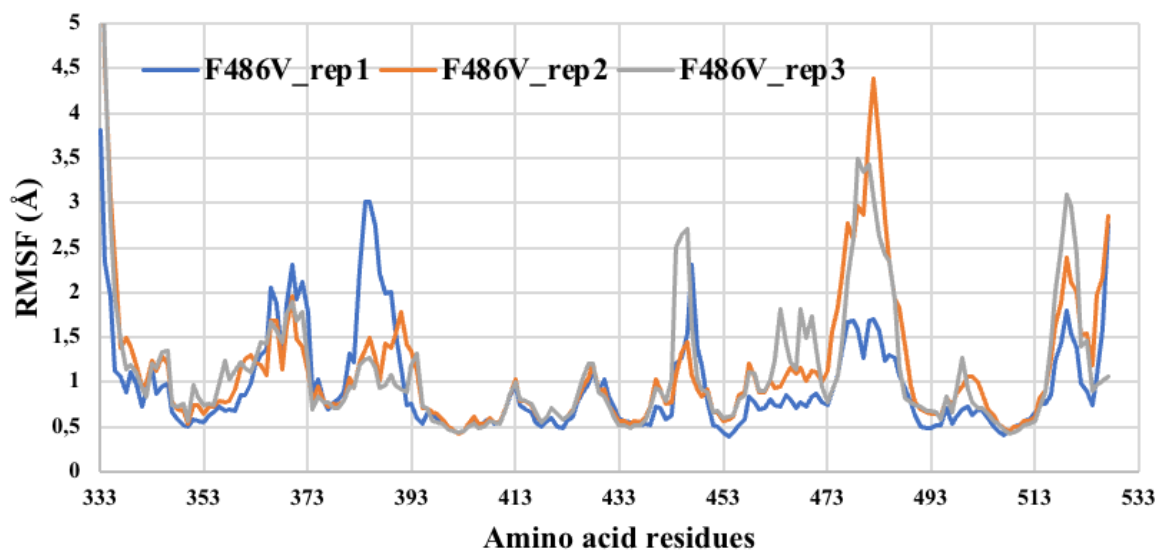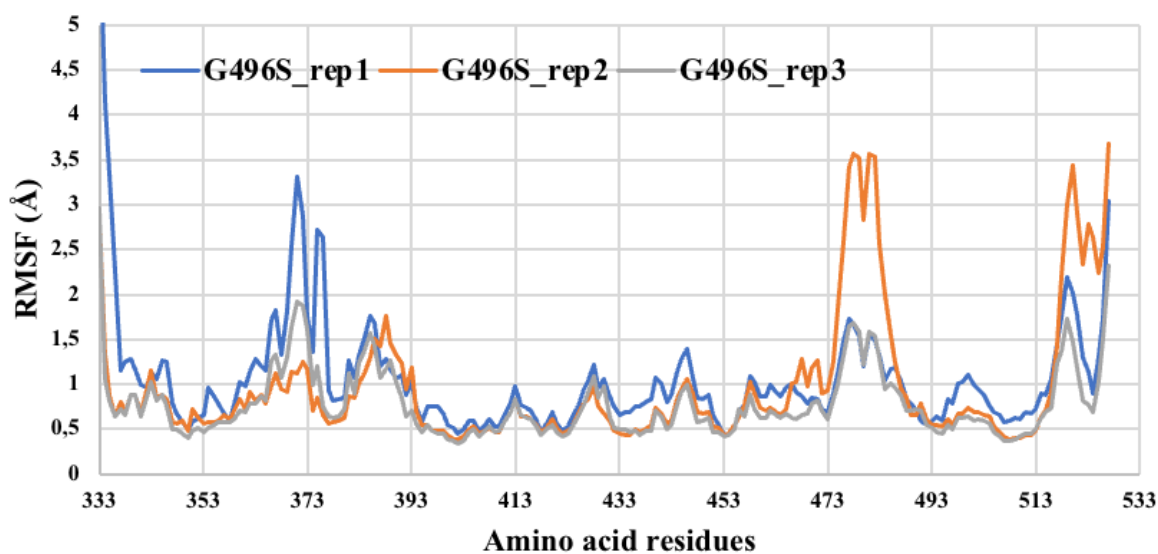

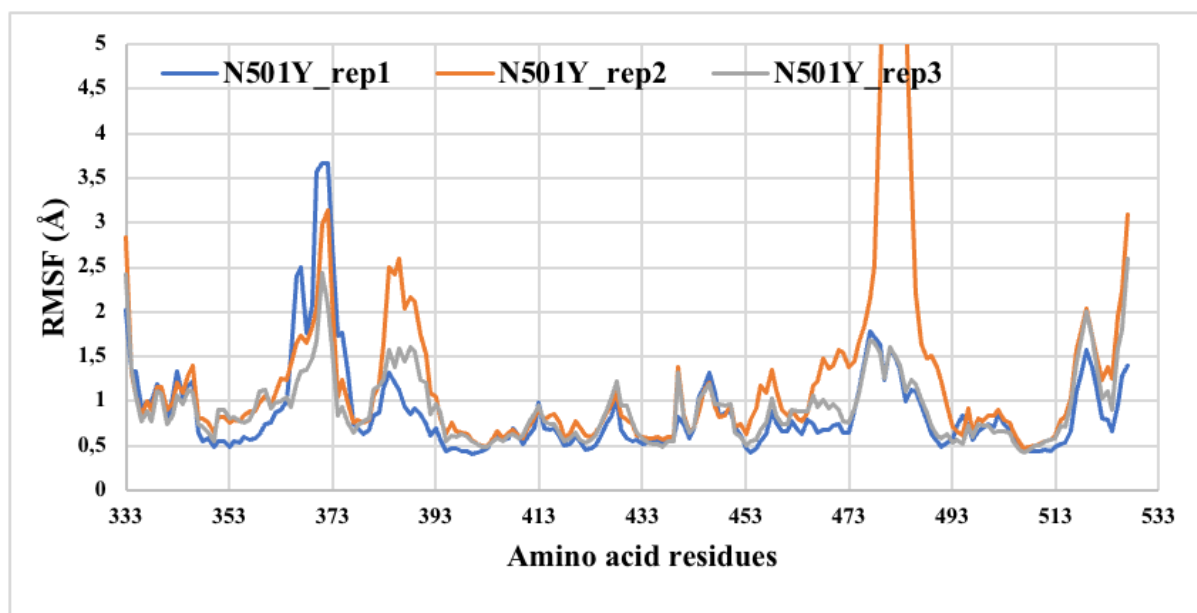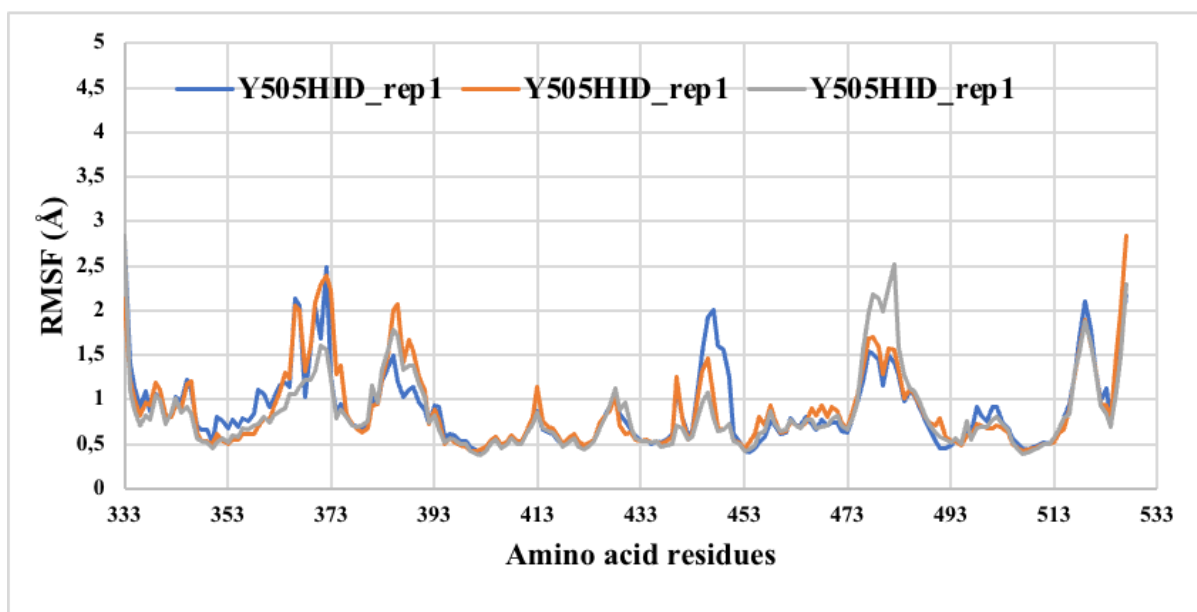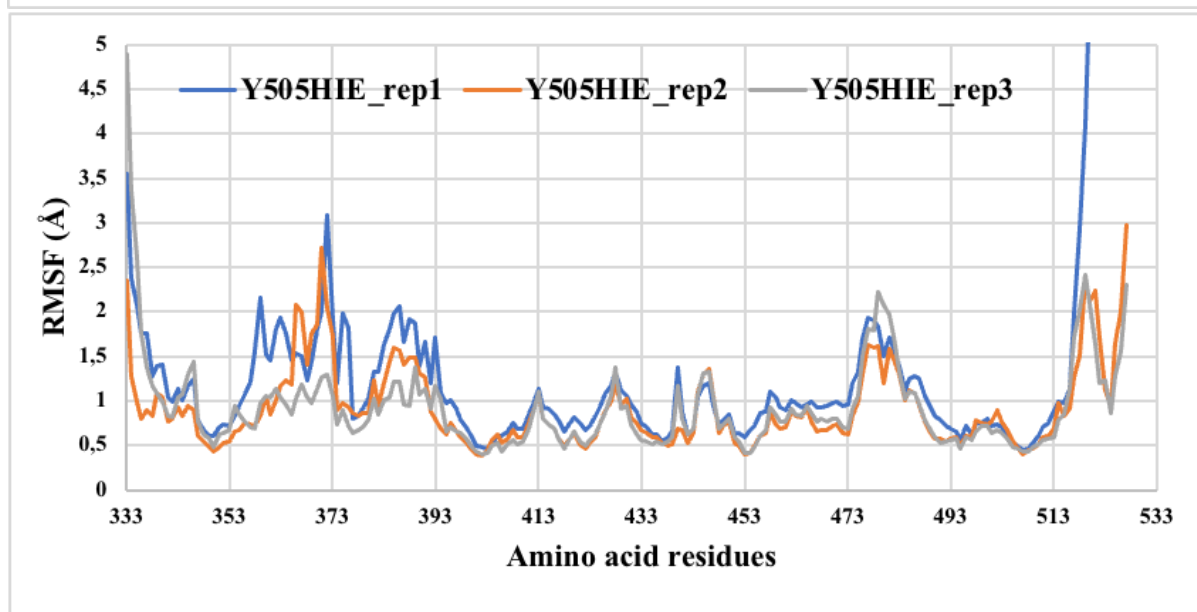

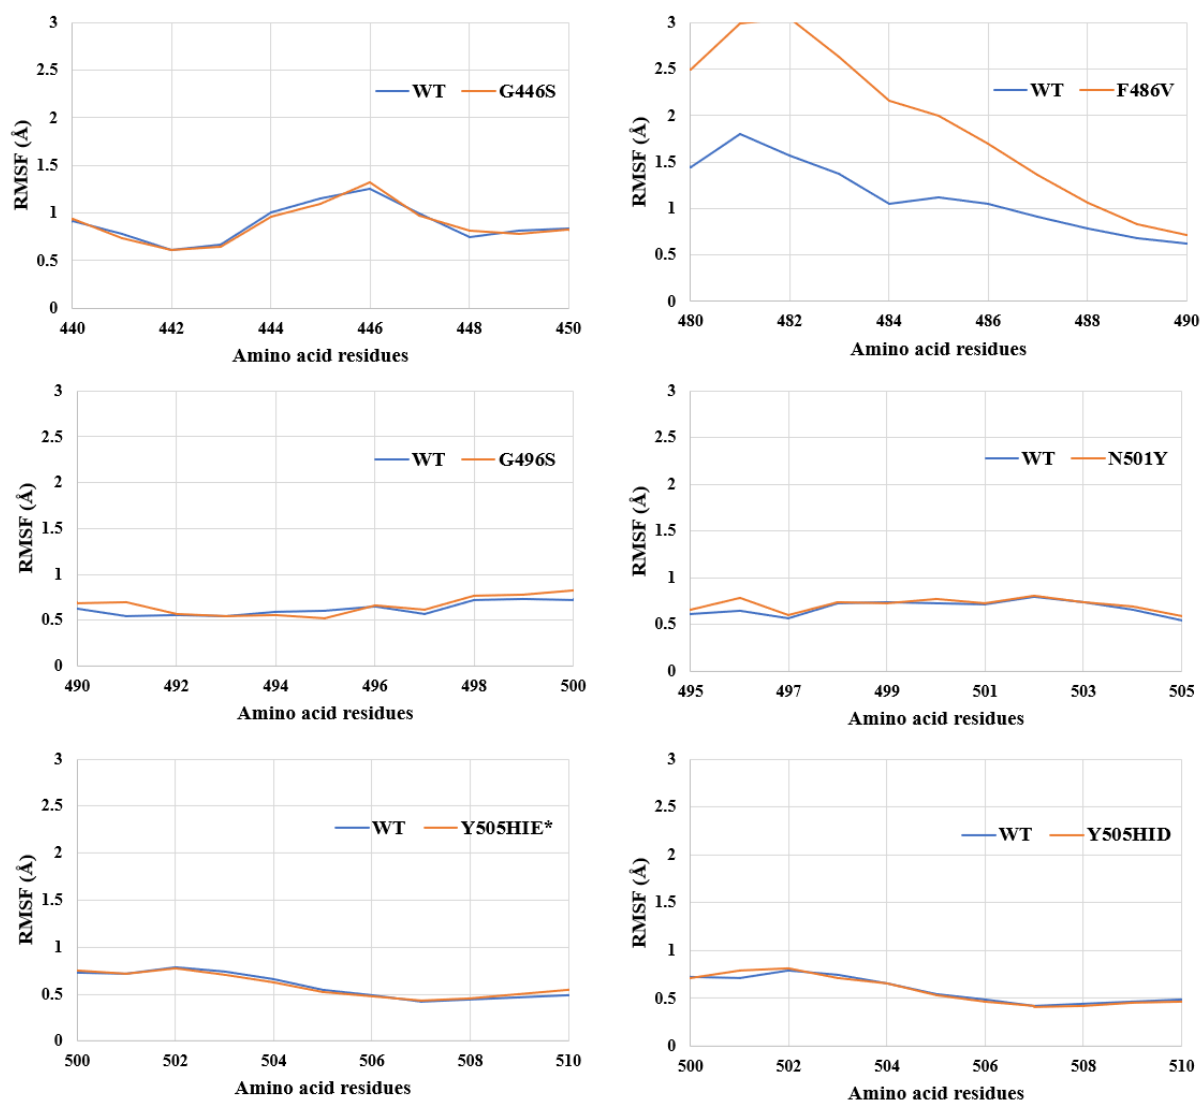

**Figure S4.** Averaged root-mean-square fluctuation (RMSF) of the residues surrounding the individual mutations of spike RBD in complex with hACE2 during three replicates of 200-ns MD simulations (\*Y505HIE mutant was simulated for 300 ns) compared with the RMSF of the corresponding residues in the WT complex. HID – histidine protonated at the delta nitrogen; HIE – histidine protonated at the epsilon nitrogen.

**Interaction analysis of spike RBD wildtype/mutant residues with hACE2 using conventional MD**

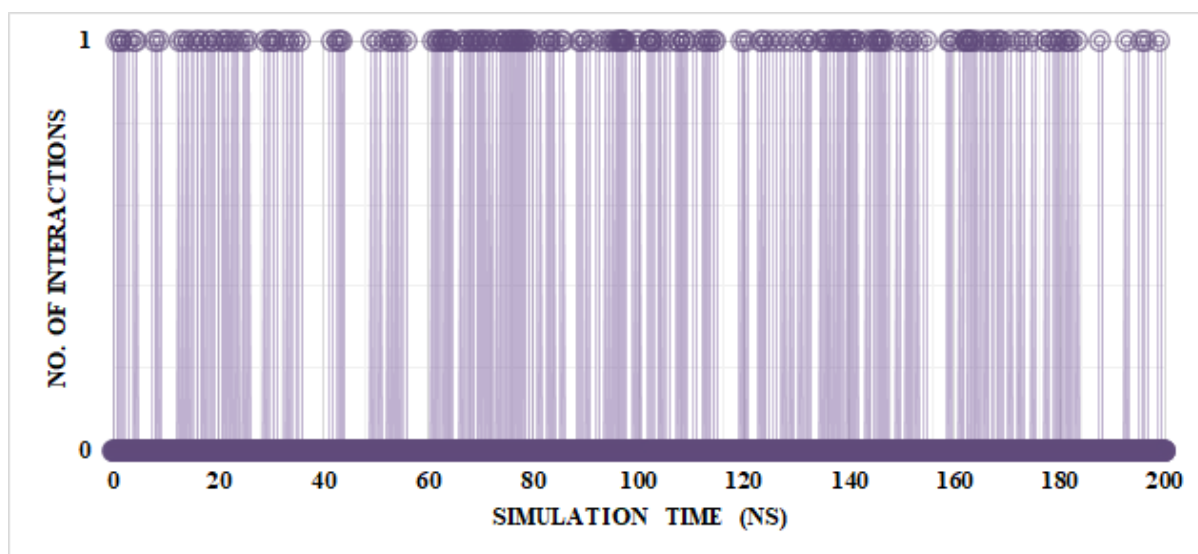

**Figure S5.** Number of pi-pi stacking interactions between Phe486 of the wildtype spike RBD and Tyr83 of hACE2 during a 200-ns MD simulation (replica 3).

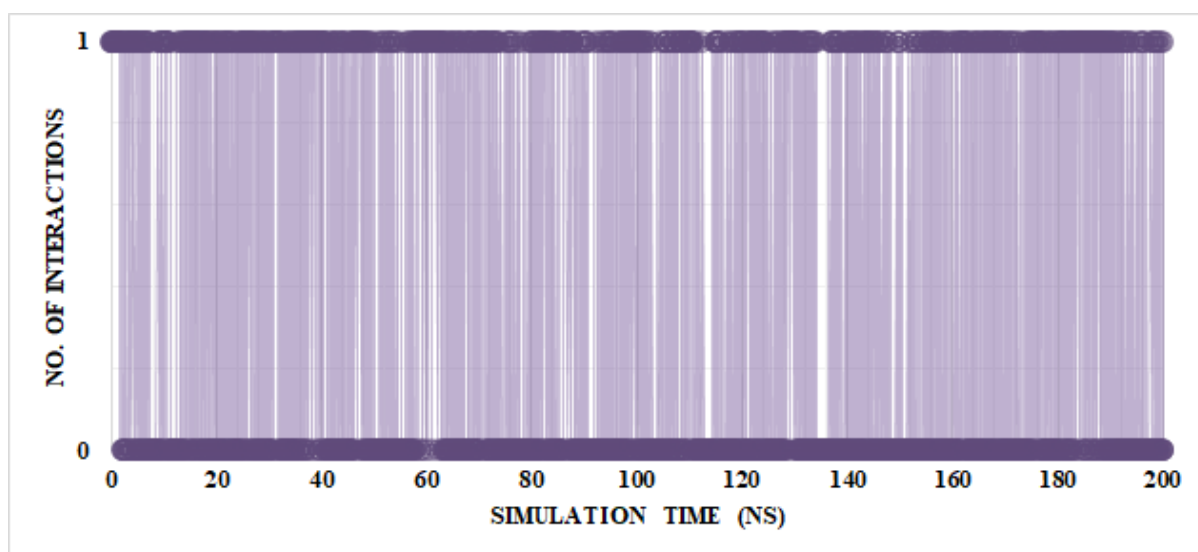

**Figure S6.** Number of pi-pi stacking interactions between Tyr501 of the mutant spike RBD and Tyr41 of hACE2 during a 200-ns MD simulation (replica 3).

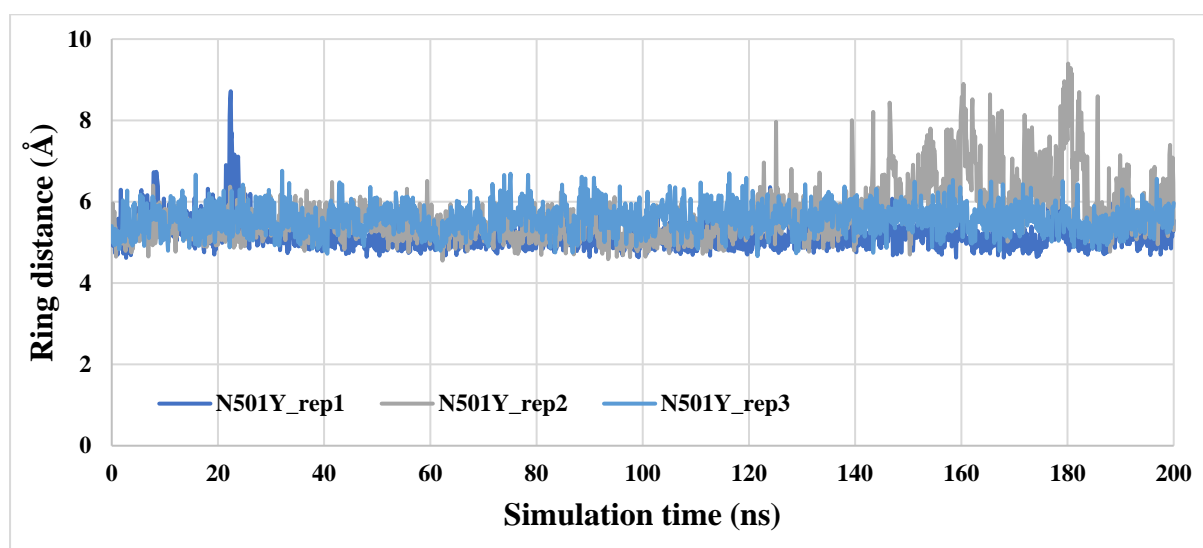

**Figure S7.** The aromatic ring distance between Tyr501 of the mutant spike RBD and Tyr41 of hACE2 during three independent 200-ns MD simulations.

**Table S1.** Experimental binding affinities of SARS-CoV-2 spike RDB mutants converted to change in binding free energies ( $\Delta\Delta G$ )

| <b>SARS-CoV-2 spike RBD mutation</b> | <b><math>Kd_{MUT}</math> (nM)</b> | <b><math>Kd_{WT}</math> (nM)</b> | <b><math>\Delta\Delta G</math> (kcal/mol)</b> | <b>Reference</b> |
|--------------------------------------|-----------------------------------|----------------------------------|-----------------------------------------------|------------------|
| <b>G446S</b>                         | 46.9 $\pm$ 3.18                   | 29.4 $\pm$ 2.62                  | 0.28 $\pm$ 0.12                               | (66)             |
| <b>N501Y</b>                         | 2.4 $\pm$ 0.4                     | 17 $\pm$ 0.6                     | -1.17 $\pm$ 0.24                              | (74)             |
|                                      | 3.0 $\pm$ 2.1                     | 10 $\pm$ 3.1                     | -0.72 $\pm$ 0.23                              | (76)             |
|                                      | 5.5 $\pm$ 2.4                     | 62.6 $\pm$ 7.7                   | -1.45 $\pm$ 0.69                              | (40)             |
|                                      | 10.7                              | 75.1                             | -1.16                                         | (77)             |
|                                      | 0.40                              | 16.0                             | -2.20                                         | (78)             |

Note: The experimental  $Kd$  values were taken from the studies collected in Table 1 and converted to  $\Delta G$  (kcal/mol) using equation  $\Delta G = RT \ln Kd$ , where  $R$  is gas constant (1.9872 mol/cal) and  $T$  is temperature in Kelvin (300 K). The final  $\Delta\Delta G$  was calculated using the equation  $\Delta\Delta G = \Delta G_{MUT} - \Delta G_{WT}$ .

**Results of the alchemical free energy calculations – PMX standard output: Final free energy plots of the mutation free energy pipeline**

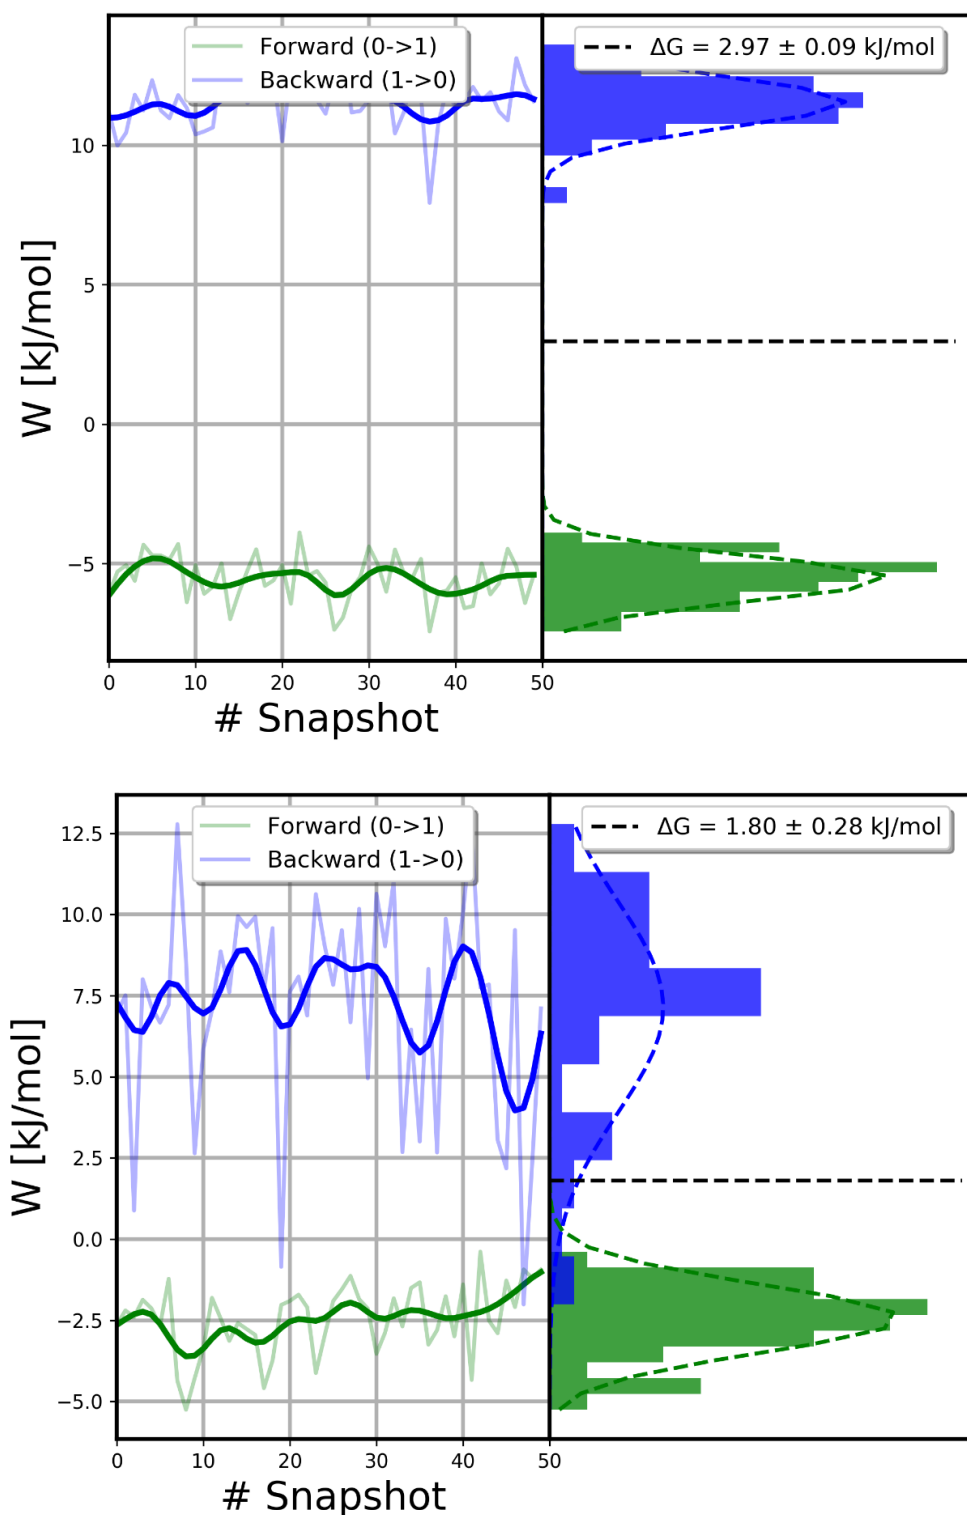

**Figure S8.** Free energy plots for unbound (top) and bound (bottom) G446S (each plot is the sum of 50 forward and 50 backward 5-ns non-equilibrium MD simulations). **Left:** Work values for the forward and backward transitions are plotted for every snapshot structure. **Right:** The work value distributions are depicted as histograms; their intersection gives the free energy difference.

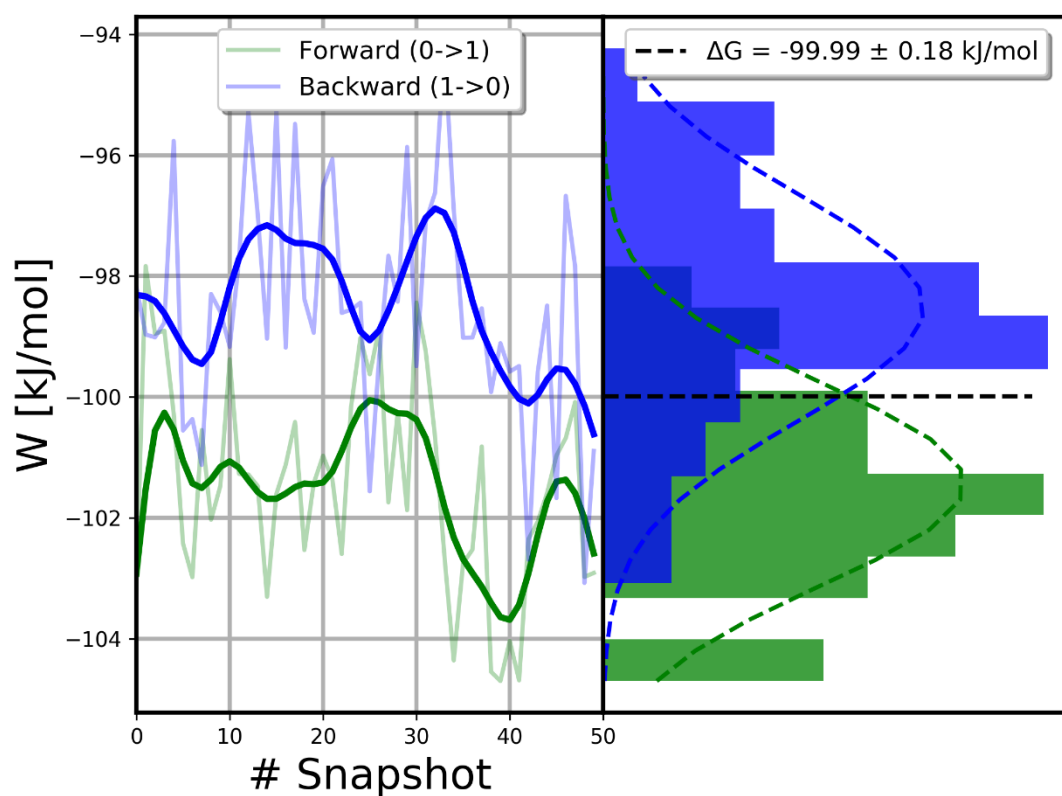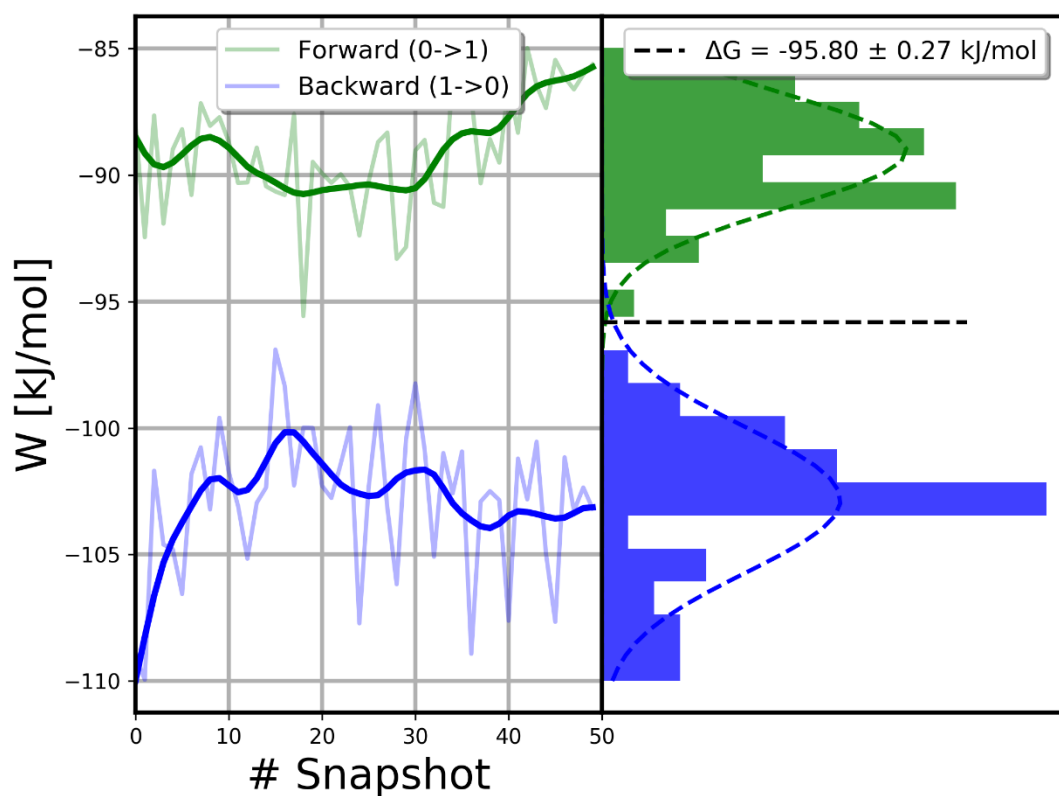

**Figure S9.** Free energy plots for unbound (top) and bound (bottom) F486V (each plot is the sum of 50 forward and 50 backward 5-ns non-equilibrium MD simulations). **Left:** Work values for the forward and backward transitions are plotted for every snapshot structure. **Right:** The work value distributions are depicted as histograms; their intersection gives the free energy difference.

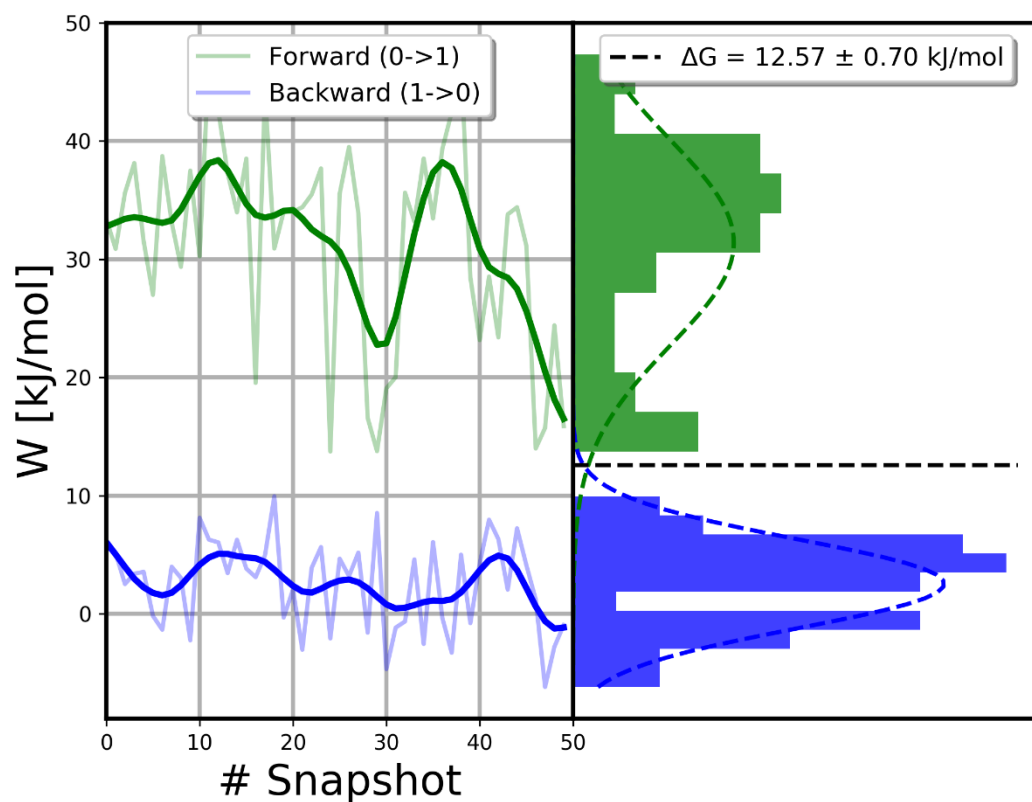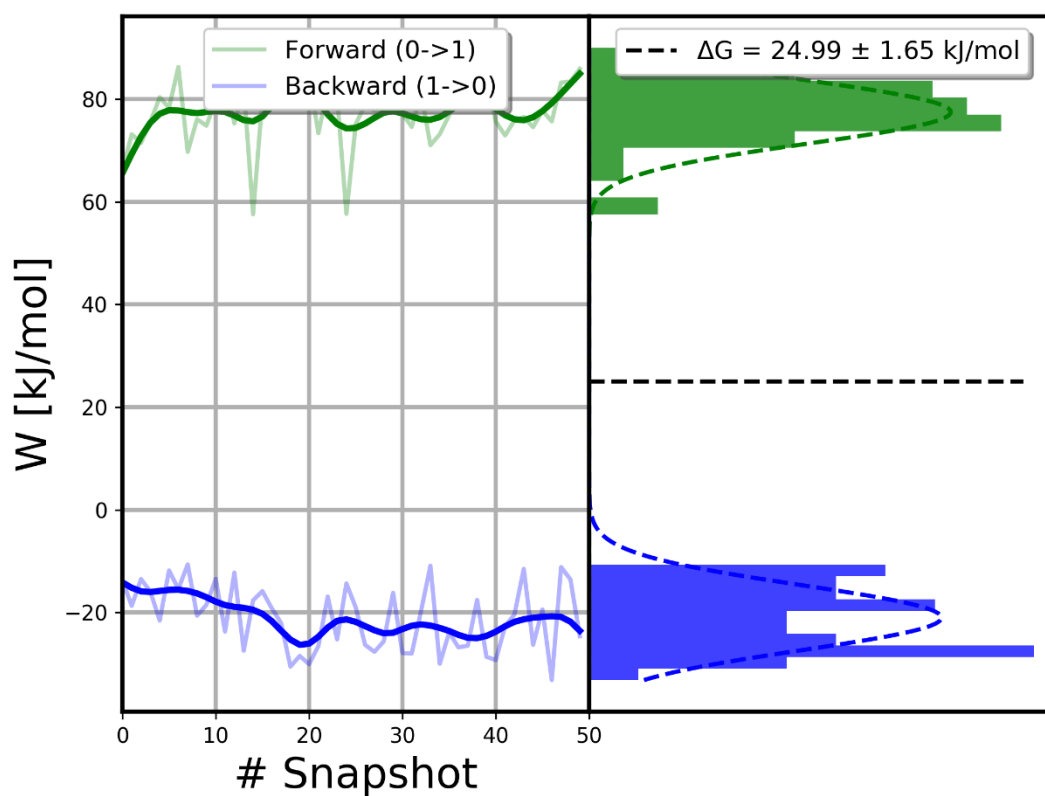

**Figure S10.** Free energy plots for unbound (top) and bound (bottom) G496S (each plot is the sum of 50 forward and 50 backward 5-ns non-equilibrium MD simulations). **Left:** Work values for the forward and backward transitions are plotted for every snapshot structure. **Right:** The work value distributions are depicted as histograms; their intersection gives the free energy difference.

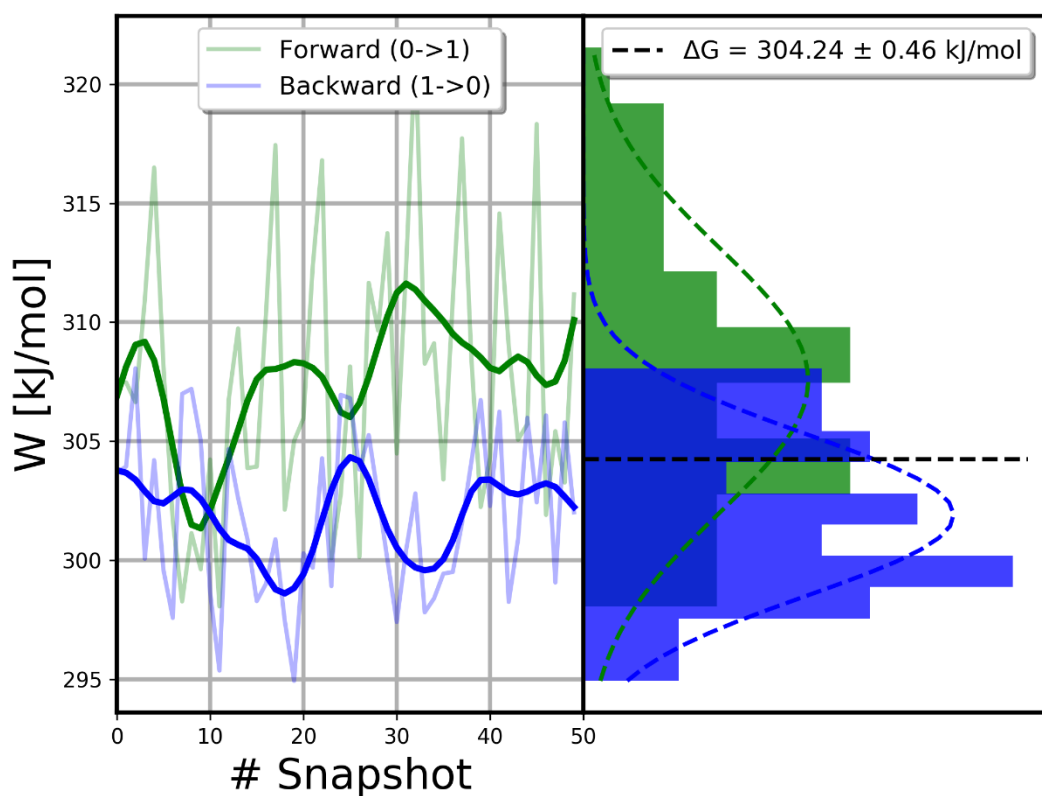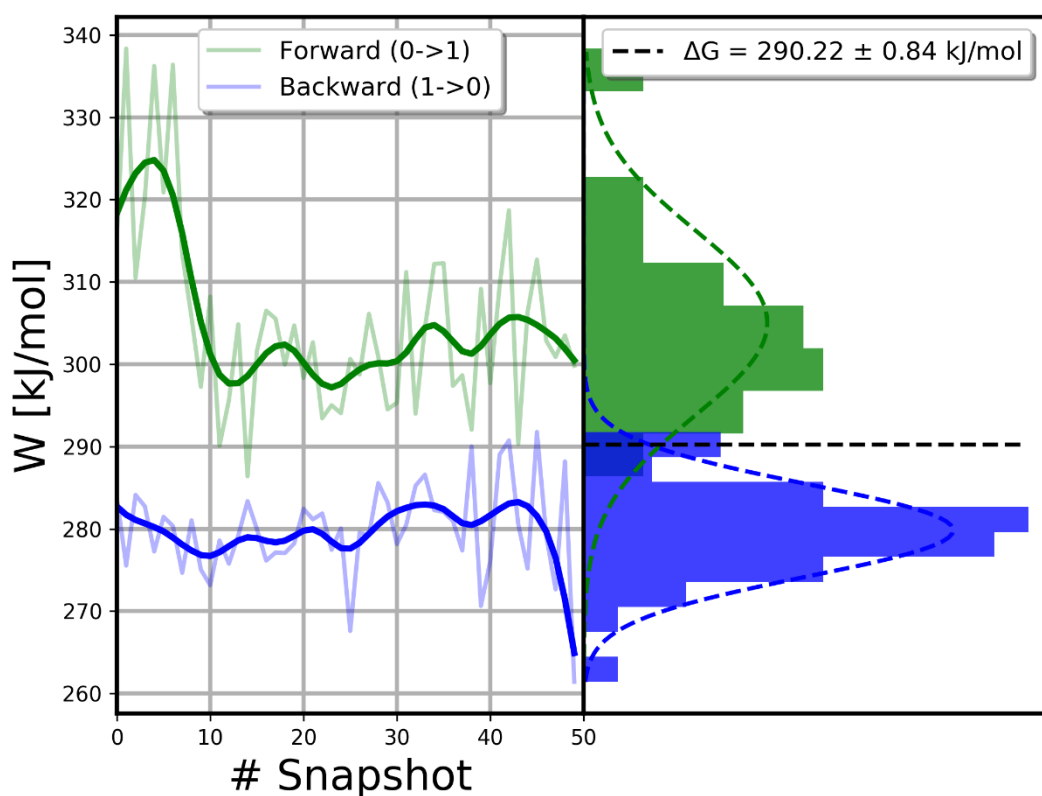

**Figure S11.** Free energy plots for unbound (top) and bound (bottom) N501Y (each plot is the sum of 50 forward and 50 backward 5-ns non-equilibrium MD simulations). **Left:** Work values for the forward and backward transitions are plotted for every snapshot structure. **Right:** The work value distributions are depicted as histograms; their intersection gives the free energy difference.

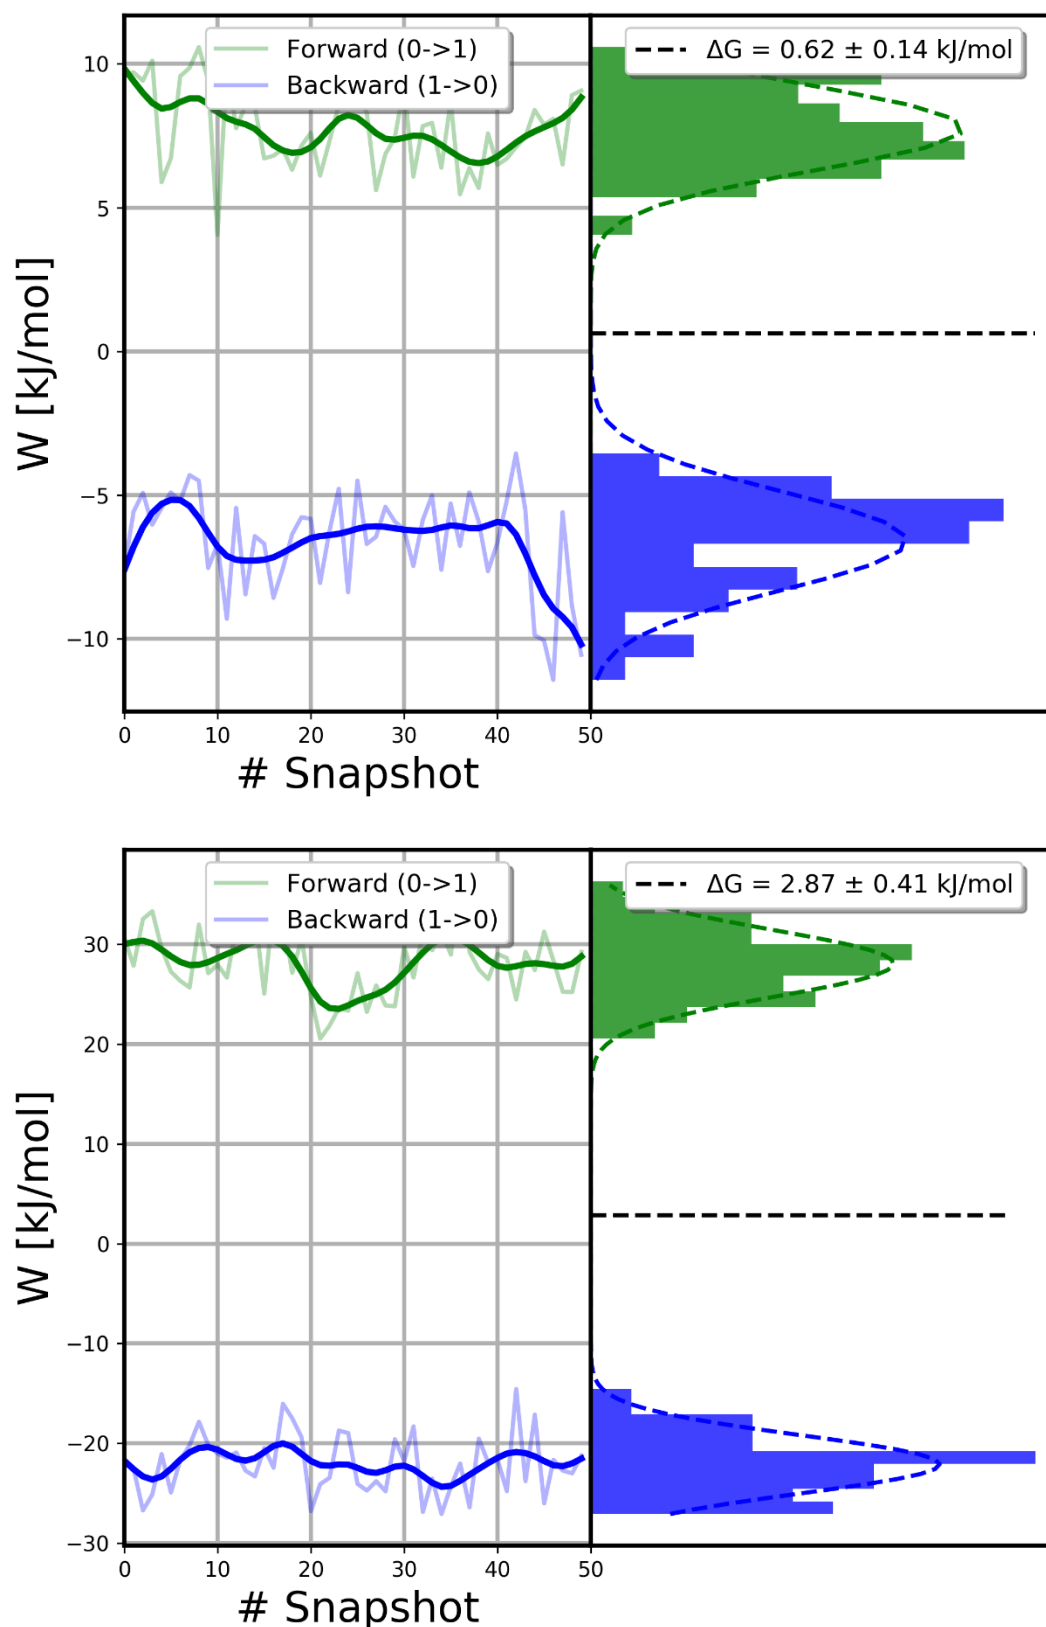

**Figure S12.** Free energy plots for unbound (top) and bound (bottom) Y505HID (each plot is the sum of 50 forward and 50 backward 5-ns non-equilibrium MD simulations). **Left:** Work values for the forward and backward transitions are plotted for every snapshot structure. **Right:** The work value distributions are depicted as histograms; their intersection gives the free energy difference.

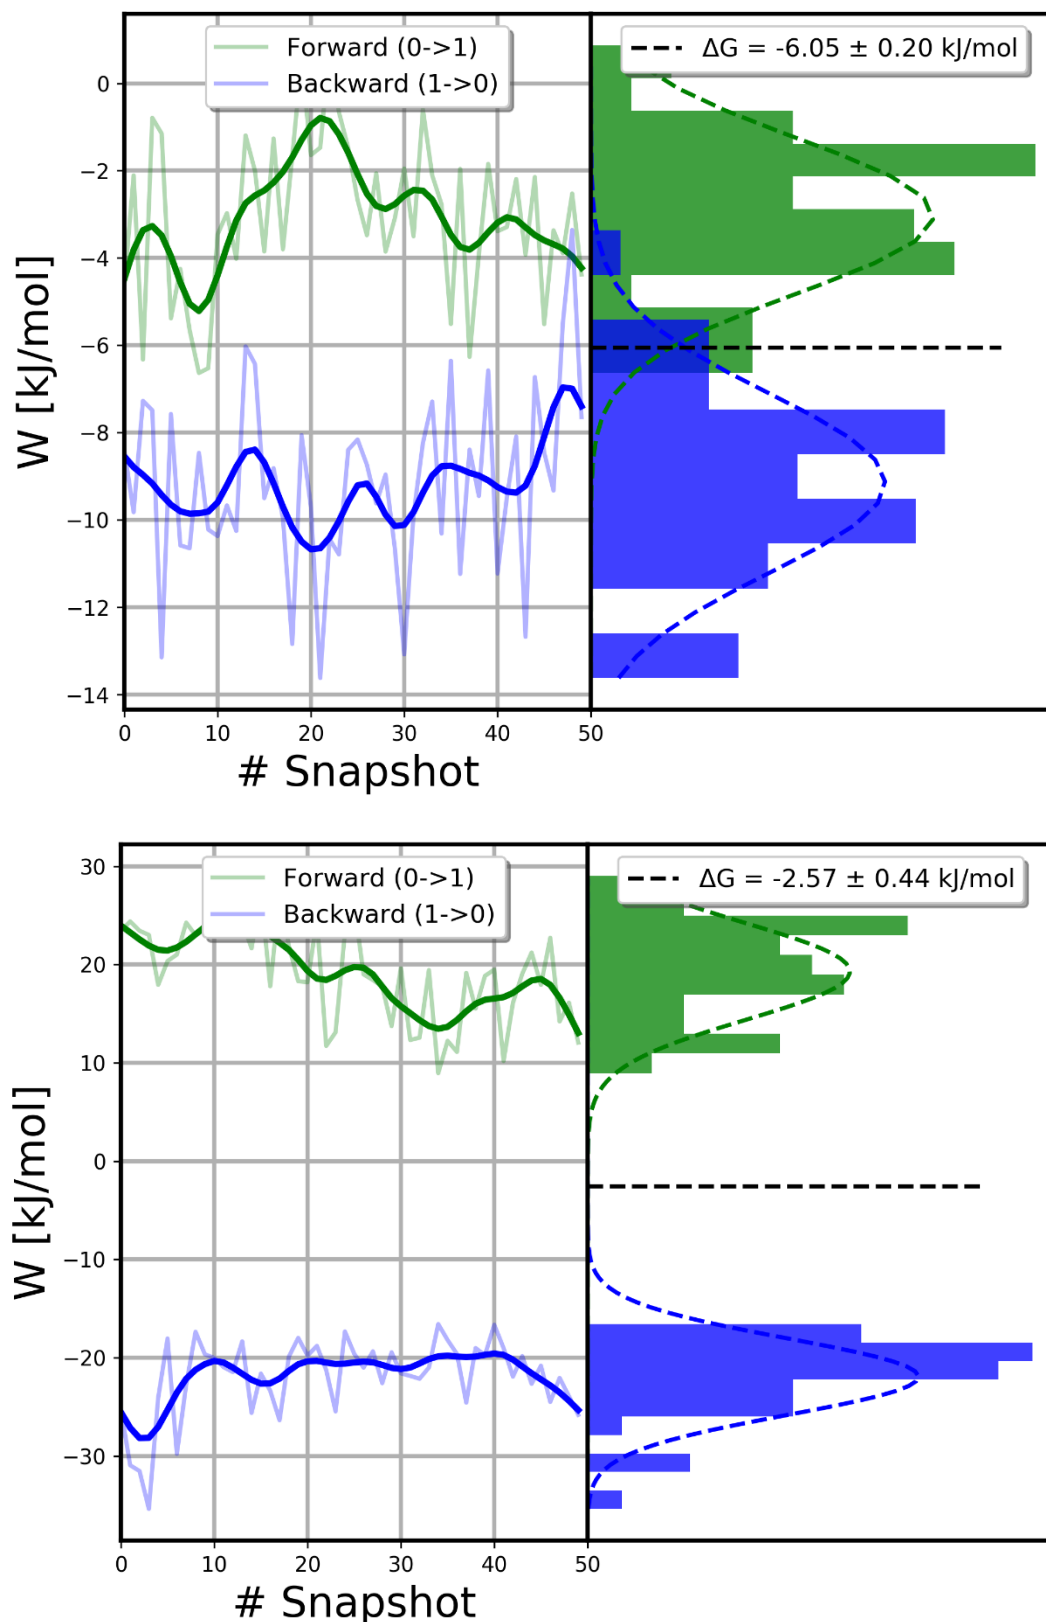

**Figure S13.** Free energy plots for unbound (top) and bound (bottom) Y505HIE (each plot is the sum of 50 forward and 50 backward 5-ns non-equilibrium MD simulations). **Left:** Work values for the forward and backward transitions are plotted for every snapshot structure. **Right:** The work value distributions are depicted as histograms; their intersection gives the free energy difference.

## Input scripts for alchemical free energy calculations:

### A. Forward

```
=====
; Non-equilibrium transition
=====

; RUN CONTROL
;-----
integrator = sd ; stochastic leap-frog integrator
nsteps = 2500000 ; 2 * 2500000 fs = 5 ns
dt = 0.002 ; 2 fs
comm-mode = Linear ; remove center of mass translation
nstcomm = 1 ; frequency for center of mass motion removal

; OUTPUT CONTROL
;-----
nstxout = 10000 ; save coordinates to .trr every 20 ps
nstvout = 10000 ; save velocities to .trr every 20 ps
nstfout = 10000 ; save forces to .trr every 20 ps
nstxout-compressed = 10000 ; xtc compressed trajectory output every 20 ps
compressed-x-precision = 1000 ; precision with which to write to the compressed
trajectory file
nstlog = 5000 ; update log file every 10 ps
nstenergy = 1000 ; save energies every 2 ps
nstcalcenergy = 1 ; calculate energies at every step

; BONDS
;-----
constraint_algorithm = lincs ; holonomic constraints
constraints = all-bonds ; constrain all-bonds
lincs-iter = 2 ; accuracy of LINCS (1 is default)
lincs-order = 6 ; also related to accuracy (4 is default)
lincs-warnangle = 30 ; maximum angle that a bond can rotate before LINCS will
complain (30 is default)
continuation = yes ; formerly known as 'unconstrained-start' - useful for exact
continuations and reruns

; NEIGHBOR SEARCHING
;-----
cutoff-scheme = Verlet ; group or Verlet
ns-type = grid ; search neighboring grid cells
nstlist = 10 ; 20 fs (default is 10)
rlist = 1.0 ; short-range neighborlist cutoff (in nm)
pbc = xyz ; 3D PBC

; ELECTROSTATICS & EWALD
;-----
coulombtype = PME ; Particle Mesh Ewald for long-range electrostatics
```

```
coulomb-modifier = Potential-shift-Verlet
rcoulomb         = 1.0           ; short-range electrostatic cutoff (in nm)
ewald-geometry   = 3d           ; Ewald sum is performed in all three dimensions
pme-order        = 4           ; interpolation order for PME (default is 4)
fourierspacing   = 0.12        ; grid spacing for FFT
ewald-rtol       = 1e-5        ; relative strength of the Ewald-shifted direct potential at
    rcoulomb
```

```
; VAN DER WAALS
```

```
;-----
vdw-type         = Cut-off      ; potential switched off at rvdw-switch to reach zero at rvdw
vdw-modifier     = Potential-shift-Verlet
rvdw            = 1.0          ; van der Waals cutoff (in nm)
DispCorr        = EnerPres     ; apply analytical long range dispersion corrections for
    Energy and Pressure
```

```
; TEMPERATURE COUPLING (Langevin)
```

```
;-----
tc-grps         = System
tau-t           = 1.0
ref-t           = 298.15
gen-vel         = no          ; Velocity generation (if gen-vel is 'yes', continuation should be
    'no')
gen-seed        = -1
```

```
; PRESSURE COUPLING
```

```
;-----
pcoupl          = Parrinello-Rahman
pcoupltype      = isotropic    ; uniform scaling of box vectors
tau_p           = 2.0          ; time constant (ps)
ref_p           = 1.0          ; reference pressure (bar)
compressibility = 4.5e-05      ; isothermal compressibility of water (bar^-1)
refcoord-scaling = no
```

```
; FREE ENERGY
```

```
;-----
free-energy      = yes
init-lambda     = 0           ; start from state A
delta-lambda    = 2.5e-07    ; complete transition in this number of steps
sc-coul         = yes        ; use soft-core also for coulombic interactions
sc-alpha        = 0.3        ; soft-core
sc-sigma        = 0.25       ;
sc-power        = 1          ;
nstdhdl         = 1          ; write to dhdl at each step
```

## **B. Reverse**

```
;=====
; Non-equilibrium transition
;=====
```

```

; RUN CONTROL
;-----
integrator = sd ; stochastic leap-frog integrator
nsteps = 2500000 ; 2 * 2500000 fs = 5 ns
dt = 0.002 ; 2 fs
comm-mode = Linear ; remove center of mass translation
nstcomm = 1 ; frequency for center of mass motion removal

; OUTPUT CONTROL
;-----
nstxout = 10000 ; save coordinates to .trr every 20 ps
nstvout = 10000 ; save velocities to .trr every 20 ps
nstfout = 10000 ; save forces to .trr every 20 ps
nstxout-compressed = 10000 ; xtc compressed trajectory output every 20 ps
compressed-x-precision = 1000 ; precision with which to write to the compressed
trajectory file
nstlog = 5000 ; update log file every 10 ps
nstenergy = 1000 ; save energies every 2 ps
nstcalcenergy = 1 ; calculate energies at every step

; BONDS
;-----
constraint_algorithm = lincs ; holonomic constraints
constraints = all-bonds ; constrain all bonds
lincs-iter = 2 ; accuracy of LINCS (1 is default)
lincs-order = 6 ; also related to accuracy (4 is default)
lincs-warnangle = 30 ; maximum angle that a bond can rotate before LINCS will
complain (30 is default)
continuation = yes ; formerly known as 'unconstrained-start' - useful for exact
continuations and reruns

; NEIGHBOR SEARCHING
;-----
cutoff-scheme = Verlet ; group or Verlet
ns-type = grid ; search neighboring grid cells
nstlist = 10 ; 20 fs (default is 10)
rlist = 1.0 ; short-range neighborlist cutoff (in nm)
pbc = xyz ; 3D PBC

; ELECTROSTATICS & EWALD
;-----
coulombtype = PME ; Particle Mesh Ewald for long-range electrostatics
coulomb-modifier = Potential-shift-Verlet
rcoulomb = 1.0 ; short-range electrostatic cutoff (in nm)
ewald-geometry = 3d ; Ewald sum is performed in all three dimensions
pme-order = 4 ; interpolation order for PME (default is 4)
fourierspacing = 0.12 ; grid spacing for FFT
ewald-rtol = 1e-5 ; relative strength of the Ewald-shifted direct potential at
rcoulomb

; VAN DER WAALS

```

```
;-----
vdw-type      = Cut-off      ; potential switched off at rvdw-switch to reach zero at rvdw
vdw-modifier   = Potential-shift-Verlet
rvdw          = 1.0          ; van der Waals cutoff (in nm)
DispCorr      = EnerPres     ; apply analytical long range dispersion corrections for
                        Energy and Pressure
```

```
; TEMPERATURE COUPLING (Langevin)
```

```
;-----
tc-grps       = System
tau-t         = 1.0
ref-t         = 298.15
gen-vel       = no          ; Velocity generation (if gen-vel is 'yes', continuation should be
                        'no')
gen-seed      = -1
```

```
; PRESSURE COUPLING
```

```
;-----
pcoupl        = Parrinello-Rahman
pcoupltype    = isotropic    ; uniform scaling of box vectors
tau_p         = 2.0          ; time constant (ps)
ref_p         = 1.0          ; reference pressure (bar)
compressibility = 4.5e-05     ; isothermal compressibility of water (bar^-1)
refcoord-scaling = no
```

```
; FREE ENERGY
```

```
;-----
free-energy    = yes
init-lambda   = 1            ; start from state B
delta-lambda  = -2.5e-07    ; complete transition in this number of steps
sc-coul       = yes         ; use soft-core also for coulombic interactions
sc-alpha      = 0.3         ; soft-core
sc-sigma      = 0.25        ;
sc-power      = 1           ;
nstdhdl       = 1           ; write to dhdl at each step
```
